# Supplementary material for: Three-dimensional domain identification in a single hexagonal manganite nanocrystal
Source: Springer Nature journal article supplement (doi:10.1038/s41467-024-48002-z), 2024-04-27
Supplement: 41467_2024_48002_MOESM3_ESM.pdf [file 41467_2024_48002_MOESM3_ESM.pdf]

## **Description of Additional Supplementary Files**

**Supplementary Movie 1:** A 3D rendering of the reconstructed displacement field, as flow lines.
